# Supplementary material
Source: PubMed Central journal article supplement (PMC5971063)
Supplement: NIHMS967046-supplement-Supporting_Information.pdf [file NIHMS967046-supplement-Supporting_Information.pdf]

## SUPPORTING INFORMATION

### Antimicrobial Activity, AME Resistance and A-site Binding Studies of Anthraquinone-Neomycin Conjugates

Natalya N. Degtyareva,<sup>a</sup> Changjun Gong,<sup>b</sup> Sandra Story,<sup>a</sup> Nathanael S Levinson<sup>d</sup>,  
Adegboyega K Oyelere<sup>d</sup>, Keith D. Green,<sup>c</sup> Sylvie Garneau-Tsodikova,<sup>c</sup> and Dev P. Arya,<sup>a,b</sup>

<sup>a</sup>NUBAD, LLC, Greenville, SC, 29605. <sup>b</sup>Department of Chemistry, Clemson University, Clemson, SC. <sup>c</sup>College of Pharmacy, University of Kentucky, Lexington, KY 40536-0596, <sup>d</sup>School of Chemistry and Biochemistry, Georgia Institute of Technology, Atlanta, GA, 30332-0400.

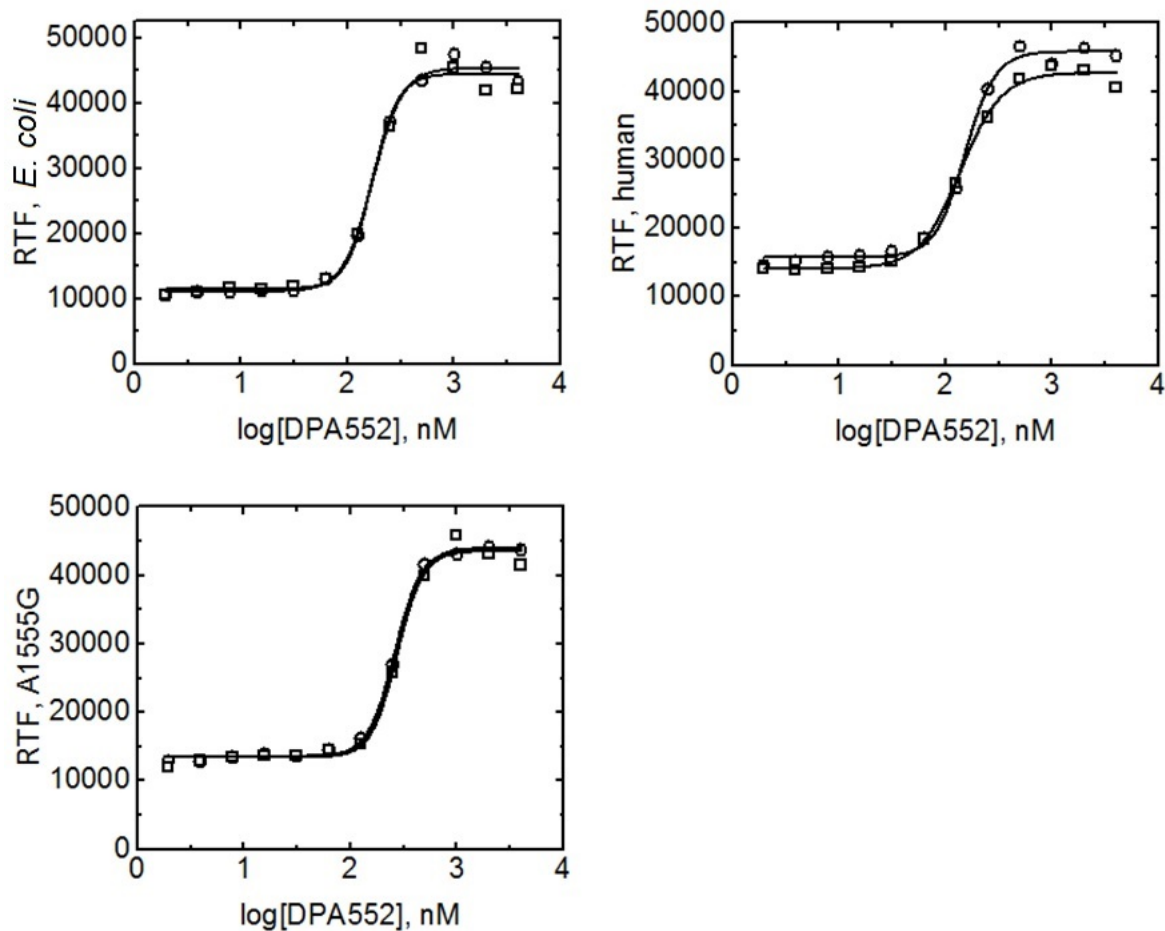

**Figure S1.** Titration plots of 100 nM A-site:F-NEO complex with compound **2**. IC<sub>50</sub> values for *E. coli*, human cytosolic, and A1555G A-sites were 173 ± 1 nM, 146 ± 10 nM, and 270 ± 10 nM, respectively.



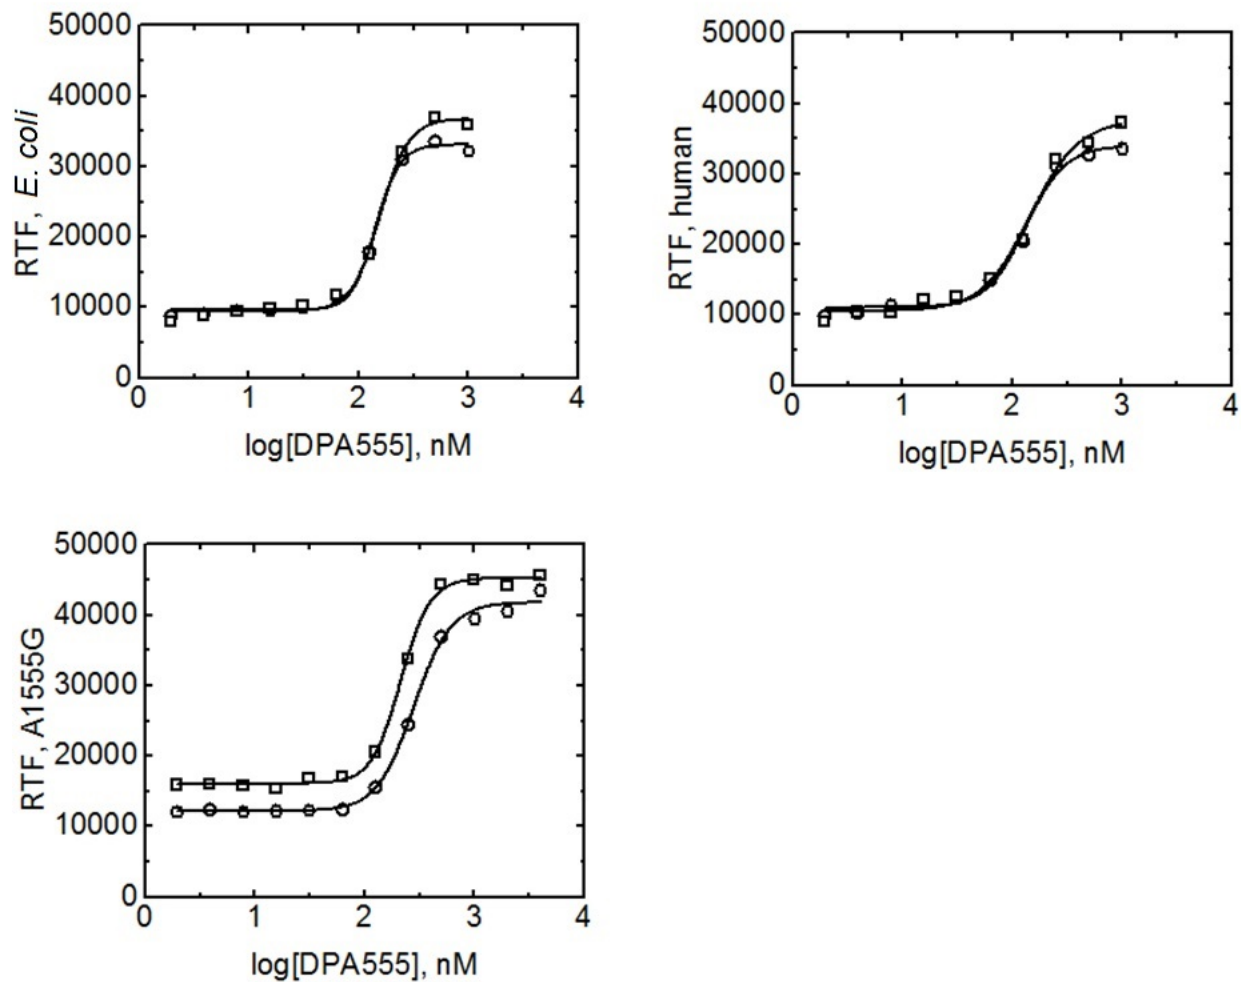

**Figure S2.** Titration plots of 100 nM A-site:F-NEO complex with compound **5**. IC<sub>50</sub> values for *E. coli*, human cytosolic, and A1555G A-sites were 151 ± 10 nM, 140 ± 10 nM, and 249 ± 47 nM, respectively.

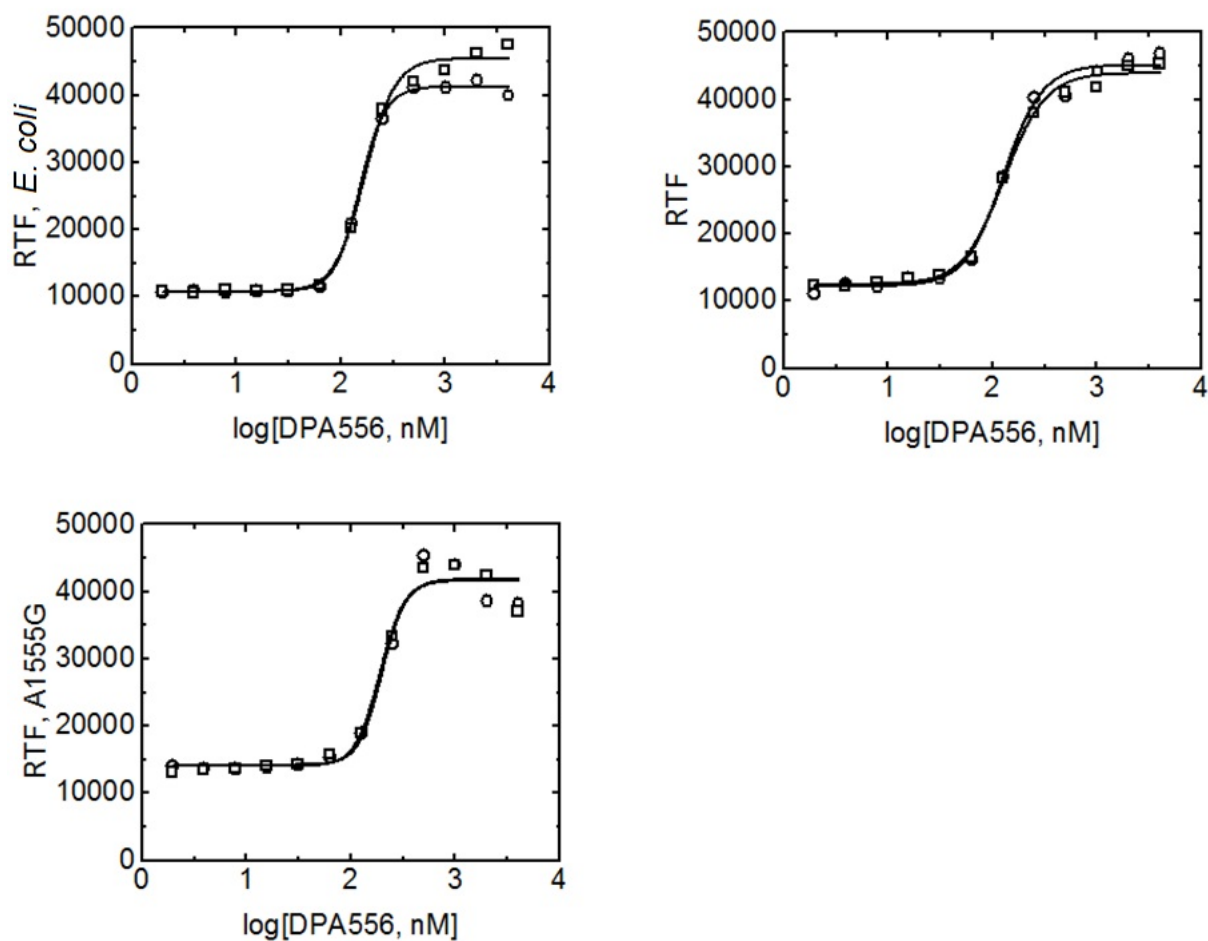

**Figure S3.** Titration plots of 100 nM A-site:F-NEO complex with compound **6**. IC<sub>50</sub> values for *E. coli*, human cytosolic, and A1555G A-sites were 162 ± 13 nM, 129 ± 1 nM, and 196 ± 4 nM, respectively.

| Compound    | Structure | Cell Free Data | IC <sub>50</sub> (nM) |
|-------------|-----------|----------------|-----------------------|
| DPA551<br>1 |           |                | NI                    |

|                        |                                                                                      |                                                                                       |                 |
|------------------------|--------------------------------------------------------------------------------------|---------------------------------------------------------------------------------------|-----------------|
| <p>DPA552</p> <p>2</p> | 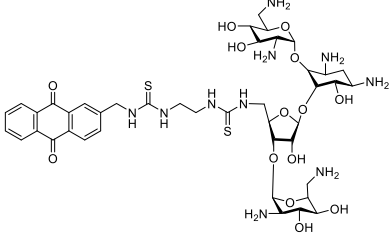    |    | <p>50±8.8</p>   |
| <p>DPA553</p> <p>3</p> |     |    | <p>303±28</p>   |
| <p>DPA554</p> <p>4</p> |   |    | <p>40.3±6.7</p> |
| <p>DPA555</p> <p>5</p> |  |  | <p>35.4±3.5</p> |
| <p>DPA556</p> <p>6</p> |   |  | <p>178±18</p>   |

|                         |  |  |                 |
|-------------------------|--|--|-----------------|
| <p>DPA557</p> <p>7</p>  |  |  | <p>91±1.7</p>   |
| <p>DPA558</p> <p>8</p>  |  |  | <p>101±16</p>   |
| <p>DPA559</p> <p>9</p>  |  |  | <p>250±35</p>   |
| <p>DPA560</p> <p>10</p> |  |  | <p>71.4±2</p>   |
| <p>DPA561</p> <p>11</p> |  |  | <p>63.7±8.5</p> |

|                                  |                                                                                     |                                                                                       |                 |
|----------------------------------|-------------------------------------------------------------------------------------|---------------------------------------------------------------------------------------|-----------------|
| <p>DPA562<br/>12</p>             | 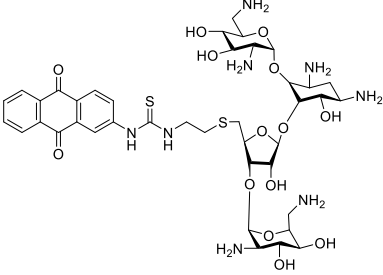   |    | <p>164±8</p>    |
| <p>Neomycin<br/>NEO</p>          |    |    | <p>139.7±10</p> |
| <p>2-amino<br/>anthraquinone</p> |   |   | <p>NI</p>       |
| <p>Azithromycin</p>              |  |  | <p>337.1±37</p> |

**Figure S4.**  $IC_{50}$  of anthraquinone-neomycin conjugates in cell-free luciferase inhibition assays for prokaryotic systems.  $IC_{50}$  is the concentration of the compound that inhibits translation of luciferase as determined in the cell-free translation assay described in the Material and Methods.

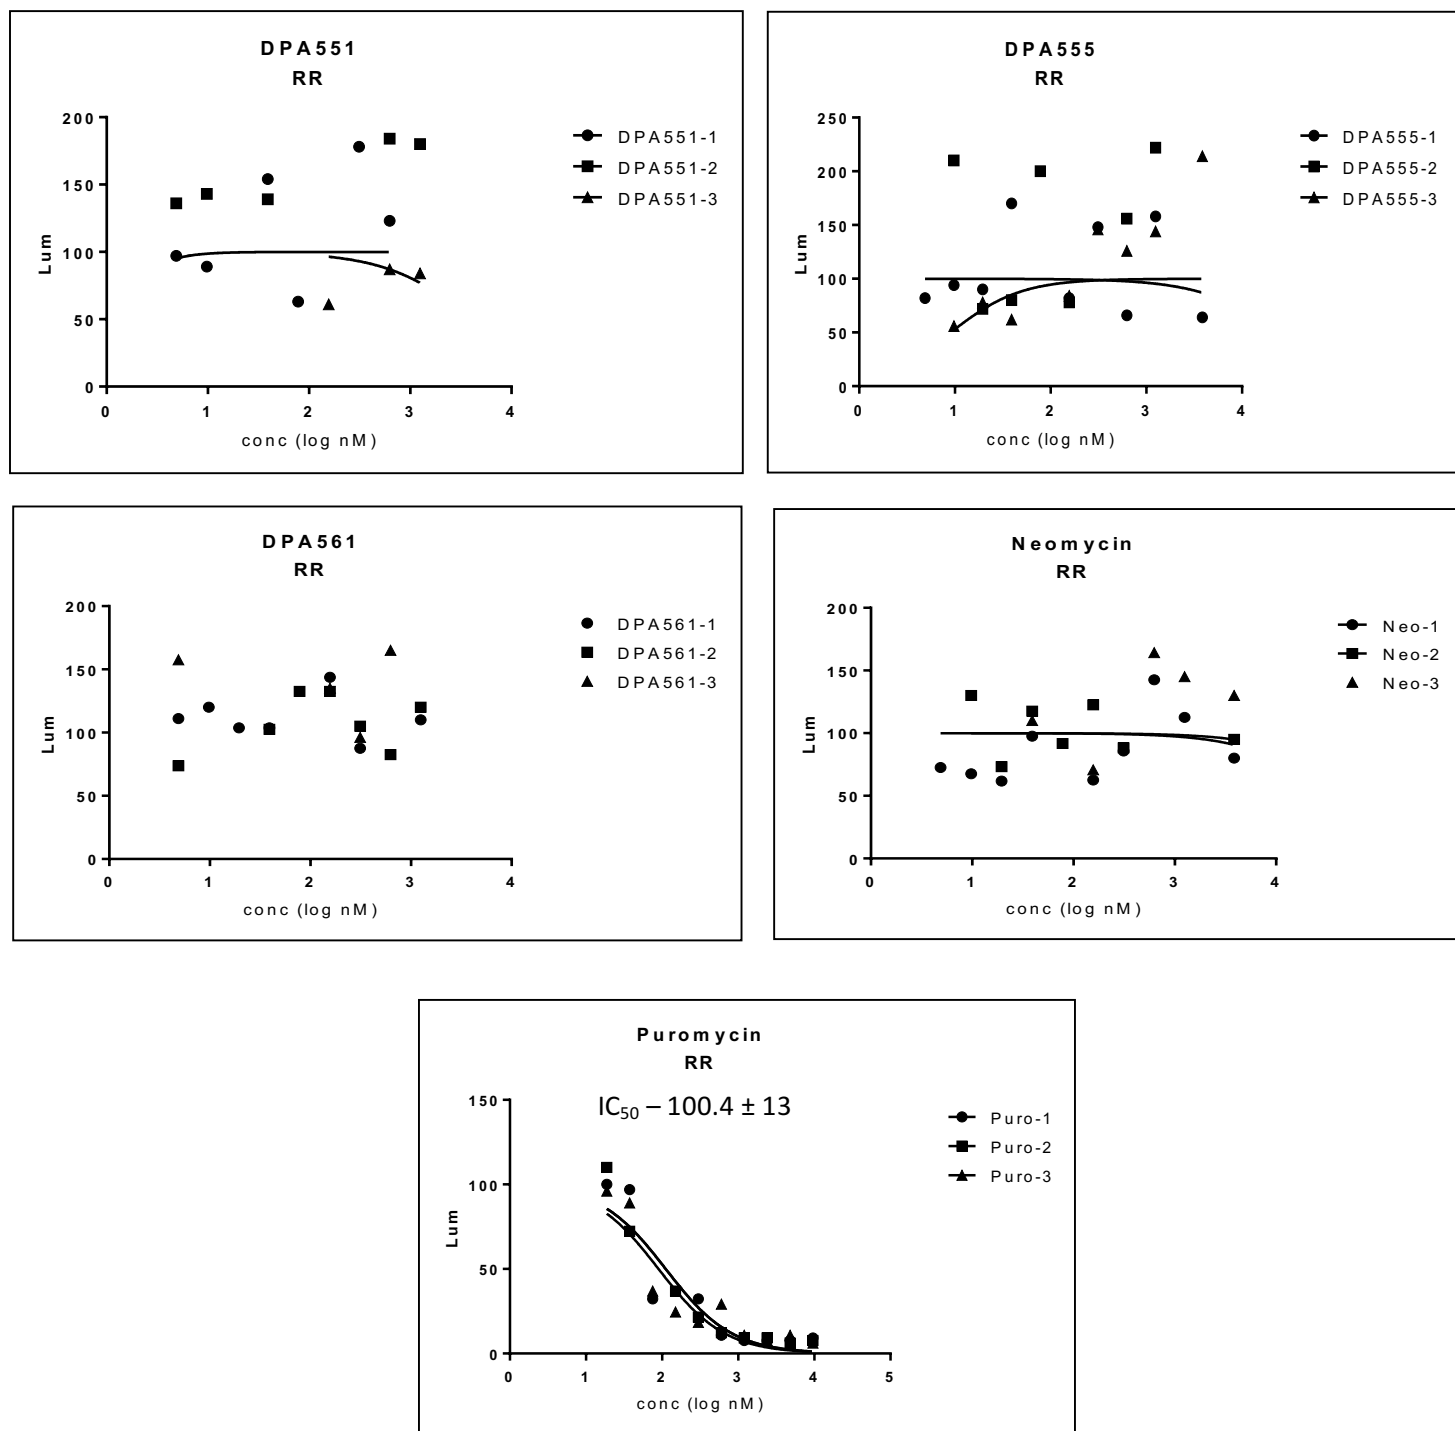

**Figure S5.** IC<sub>50</sub> of anthraquinone-neomycin conjugates in cell-free luciferase inhibition assays for eukaryotic systems. IC<sub>50</sub> is the concentration of the compound that inhibits translation of luciferase as determined in the cell-free translation assay described in the Material and Methods.
